# Supplementary material for: Complete dissolution and partial delignification of wood in the ionic liquid 1-ethyl-3-methylimidazolium acetate
Source: Royal Society of Chemistry journal article supplement (doi:10.1039/b822702k), 2009-01-01
Supplement: b822702k.pdf [file b822702k.pdf]

## SUPPLEMENTARY INFORMATION

# Complete dissolution and partial delignification of wood in the ionic liquid 1-ethyl-3-methylimidazolium acetate

*Ning Sun,<sup>a</sup> Mustafizur Rahman,<sup>a</sup> Ying Qin,<sup>a</sup> Mirela L. Maxim,<sup>a</sup> Héctor Rodríguez,<sup>b</sup> and  
Robin D. Rogers<sup>a,b,\*</sup>*

<sup>a</sup> Center for Green Manufacturing and Department of Chemistry, The University of Alabama, Tuscaloosa, AL 35487, USA

<sup>b</sup> QUILL, School of Chemistry and Chemical Engineering, The Queen's University of Belfast, Belfast, BT9 5AG, Northern Ireland, UK

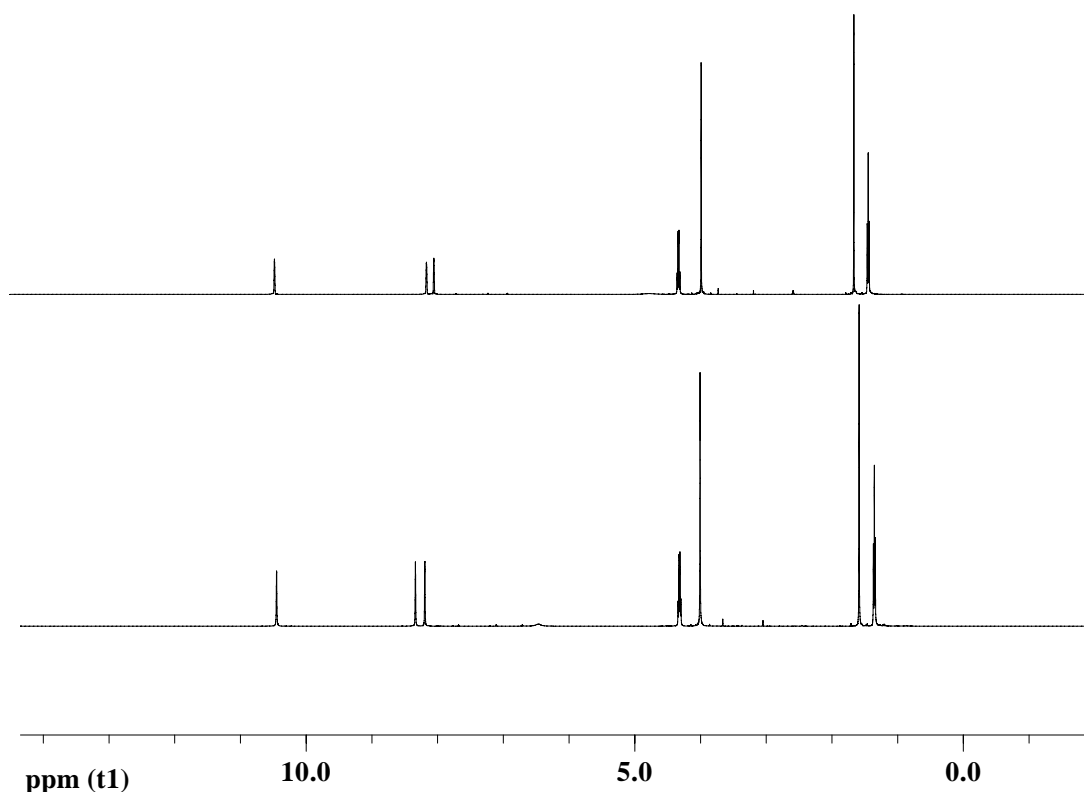

**Figure S1.** <sup>1</sup>H NMR spectra for original [C<sub>2</sub>mim]OAc (top) and for [C<sub>2</sub>mim]OAc heated at 110 °C for 48 h (bottom), indicating apparent non-degradation of the IL after the thermal treatment.

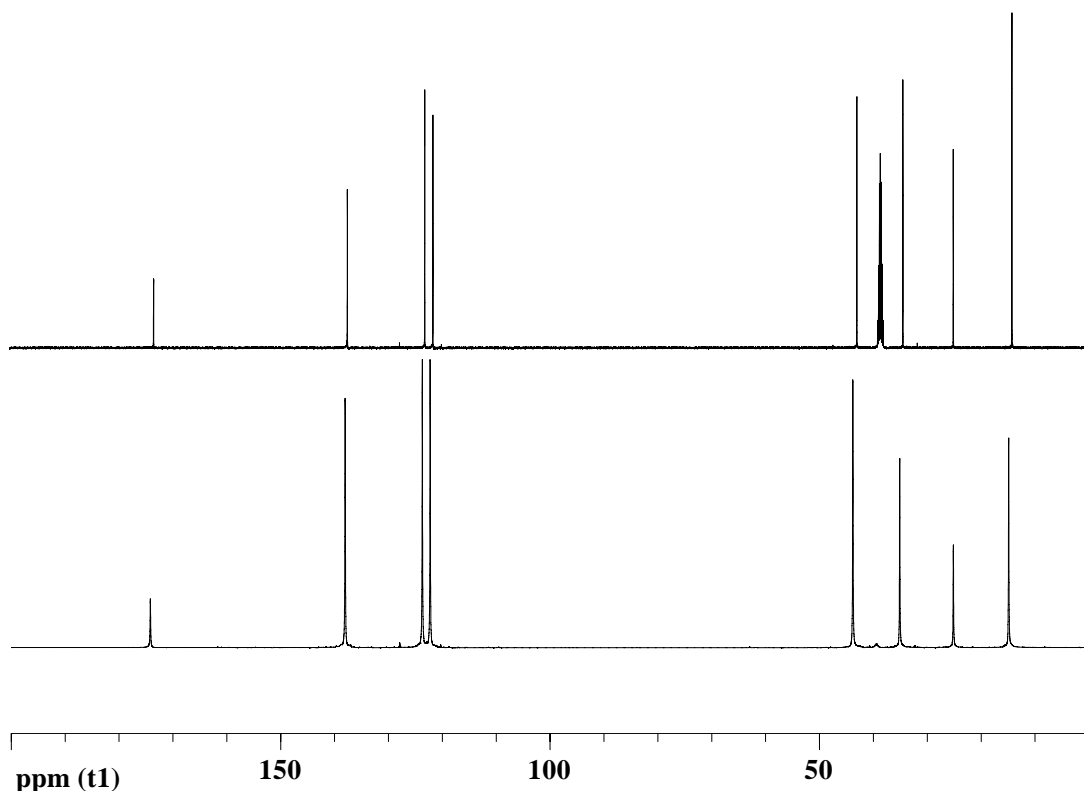

**Figure S2.**  $^{13}\text{C}$  NMR spectra for original  $[\text{C}_2\text{mim}]\text{OAc}$  (top) and for  $[\text{C}_2\text{mim}]\text{OAc}$  heated at  $110\text{ }^\circ\text{C}$  for 48 h (bottom) indicating apparent non-degradation of the IL after the thermal treatment.

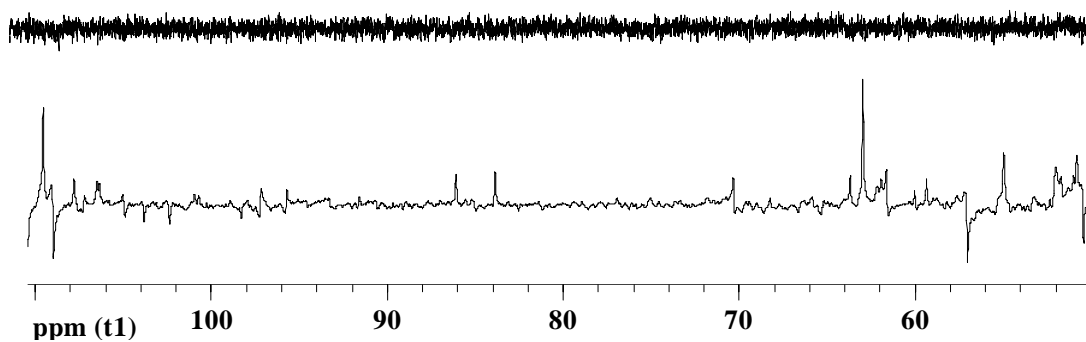

**Figure S3.** Magnified view of  $^{13}\text{C}$  NMR spectra in the range of 50-110 ppm: original  $[\text{C}_2\text{mim}]\text{OAc}$  (top) and  $[\text{C}_2\text{mim}]\text{OAc}$  heated at  $110\text{ }^\circ\text{C}$  for 48 h (bottom), likely indicating some minor degradation of  $[\text{C}_2\text{mim}]\text{OAc}$  after the thermal treatment.

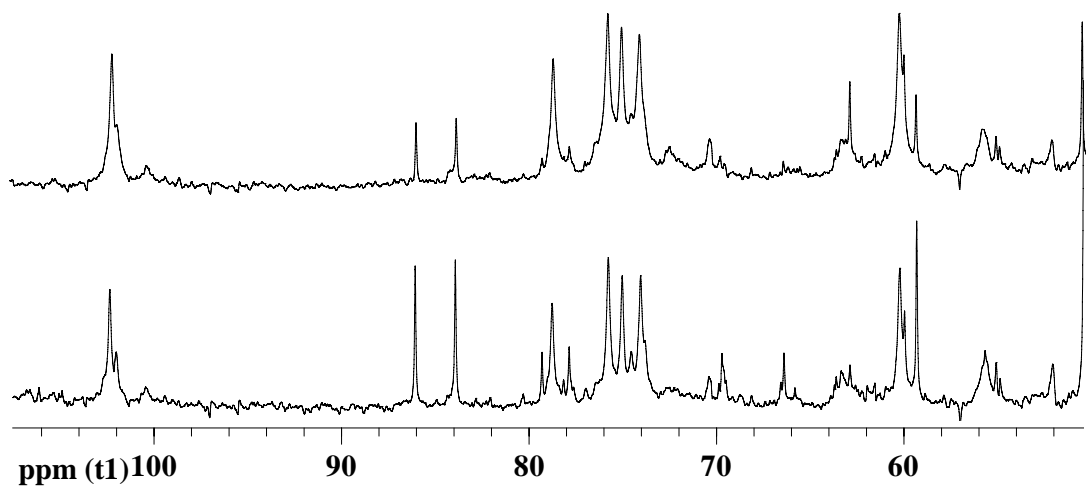

**Figure S4.**  $^{13}\text{C}$  NMR spectra of 5 parts of wood (southern yellow pine) in 100 parts of  $[\text{C}_2\text{mim}]\text{OAc}$  after dissolution at  $110\text{ }^\circ\text{C}$  for 16 h (top) and for 47 h (bottom), indicating more degradation with longer heating time.
